# Supplementary material for: Atomic and electronic structure transformations in SnS2at high pressures: a joint single crystal X-ray diffraction and DFT study
Source: Royal Society of Chemistry journal article supplement (doi:10.1039/c5dt04532k), 2016-01-01
Supplement: c5dt04532k1.pdf [file c5dt04532k1.pdf]

**Supporting information for:**

**Atomic and electronic structure transformations in SnS<sub>2</sub> at high pressures: A joint single crystal X-ray diffraction and DFT study**

M. Ø. Filsø, E. Eikeland, J. Zhang, S. R. Madsen, B. B. Iversen

Center for Materials Crystallography, Department of Inorganic Chemistry and iNANO, Aarhus University (DK)

**Table S1.** Data collection strategy at ambient pressure (no DAC). Frame width = 1.0000°, exposure time = 5.0000 seconds.

| <i>Run #</i> | <i>Type</i> | <i>Start (°)</i> | <i>End (°)</i> | <i>Theta (°)</i> | <i>Kappa (°)</i> | <i>Phi (°)</i> | <i>Frames</i> |
|--------------|-------------|------------------|----------------|------------------|------------------|----------------|---------------|
| 1            | Omega       | -78.00           | -6.00          | -19.8195         | 130.0000         | -67.0000       | 72            |
| 2            | Omega       | -96.00           | -22.00         | -19.8195         | -77.0000         | 60.0000        | 74            |
| 3            | Omega       | -48.00           | 53.00          | -19.8195         | 57.0000          | -180.0000      | 101           |

**Table S2.** Data collection strategy at high pressure. Frame width = 0.3000°, exposure time = 30.0000 seconds.

| <i>Run #</i> | <i>Type</i> | <i>Start (°)</i> | <i>End (°)</i> | <i>Theta (°)</i> | <i>Chi (°)</i> | <i>Phi (°)</i> | <i>Frames</i> |
|--------------|-------------|------------------|----------------|------------------|----------------|----------------|---------------|
| 1            | Omega       | -10.000          | 20.000         | -12.500          | 54.726         | 90.000         | 100           |
| 2            | Omega       | 40.000           | 105.000        | 12.500           | 54.726         | 90.000         | 216           |
| 3            | Omega       | 25.000           | 90.000         | -12.500          | -54.726        | 90.000         | 216           |
| 4            | Omega       | 40.000           | 70.000         | 12.500           | -54.726        | 90.000         | 100           |
| 5            | Omega       | -10.000          | 20.000         | -12.500          | 54.726         | 270.000        | 100           |
| 6            | Omega       | 40.000           | 105.000        | 12.500           | 54.726         | 270.000        | 216           |
| 7            | Omega       | 25.000           | 90.000         | -12.500          | -54.726        | 270.000        | 216           |
| 8            | Omega       | 40.000           | 70.000         | 12.500           | -54.726        | 270.000        | 100           |
| 9            | Omega       | 40.000           | 105.000        | 12.500           | 90.000         | 90.000         | 216           |
| 10           | Omega       | 25.000           | 90.000         | -12.500          | -90.000        | 90.000         | 216           |
| 11           | Omega       | 40.000           | 105.000        | 12.500           | 90.000         | 270.000        | 216           |
| 12           | Omega       | 25.000           | 90.000         | -12.500          | -90.000        | 270.000        | 216           |

**Table S3.** Selected results from data collection and reduction

| <i>p (GPa)</i> | <i>Completeness (%)</i> | <i>Redundancy</i> | <i>Max 2θ (°)</i> | <i>R(int)</i> |
|----------------|-------------------------|-------------------|-------------------|---------------|
| 0.0001(0)      | 98.3                    | 4.70              | 64.33             | 0.0649        |
| 0.664(9)       | 32.8                    | 6.35              | 53.17             | 0.0241        |
| 1.109(11)      | 33.3                    | 6.42              | 53.26             | 0.0277        |
| 1.991(16)      | 32.6                    | 2.58              | 53.46             | 0.0200        |
| 3.40(3)        | 32.8                    | 2.56              | 53.71             | 0.0169        |
| 4.22(3)        | 32.1                    | 2.48              | 53.85             | 0.0202        |
| 6.29(5)        | 31.3                    | 2.38              | 54.21             | 0.0234        |
| 8.08(6)        | 35.6                    | 2.94              | 49.68             | 0.0207        |
| 9.78(8)        | 35.6                    | 2.89              | 49.91             | 0.0178        |
| 11.88(9)       | 33.3                    | 6.43              | 50.02             | 0.0230        |
| 13.68(19)      | 37.1                    | 4.77              | 50.08             | 0.0228        |
| 14.8(2)        | 36.1                    | 4.70              | 50.11             | 0.0204        |
| 16.8(4)        | 34.0                    | 6.78              | 50.22             | 0.0255        |
| 20(1)          | 32.0                    | 2.93              | 50.53             | 0.0257        |

**Table S4.** Selected results from refinement.

| $p$ (GPa) | Extinction | $U_{iso}(S)$ | $U_{iso}(Sn)$ | $R1$   | $GOF$ |
|-----------|------------|--------------|---------------|--------|-------|
| 0.0001(0) | 1.25(10)   | 0.0110(4)    | 0.0117(4)     | 0.0236 | 1.142 |
| 0.664(9)  | 0.85(14)   | 0.0096(5)    | 0.0078(4)     | 0.0210 | 1.257 |
| 1.109(11) | 0.86(14)   | 0.0095(5)    | 0.0076(4)     | 0.0218 | 1.149 |
| 1.991(16) | 0.53(9)    | 0.0089(5)    | 0.0071(4)     | 0.0201 | 1.235 |
| 3.40(3)   | 0.27(4)    | 0.0091(5)    | 0.0074(4)     | 0.0198 | 1.223 |
| 4.22(3)   | 0.23(5)    | 0.0087(4)    | 0.0067(3)     | 0.0159 | 1.383 |
| 6.29(5)   | 0.19(6)    | 0.0080(5)    | 0.0066(4)     | 0.0165 | 1.174 |
| 8.08(6)   | 0.18(6)    | 0.0080(5)    | 0.0067(4)     | 0.0186 | 1.394 |
| 9.78(8)   | 0.17(10)   | 0.0077(6)    | 0.0060(5)     | 0.0180 | 1.549 |
| 11.88(9)  | 0.06(4)    | 0.0086(5)    | 0.0073(4)     | 0.0171 | 1.264 |
| 13.68(19) | -          | 0.0087(5)    | 0.0079(3)     | 0.0158 | 1.318 |
| 14.8(2)   | -          | 0.0097(4)    | 0.0087(2)     | 0.0138 | 1.422 |
| 16.8(4)   | -          | 0.0101(6)    | 0.0091(3)     | 0.0209 | 1.398 |
| 20(1)     | -          | 0.0094(6)    | 0.0085(3)     | 0.0201 | 1.319 |

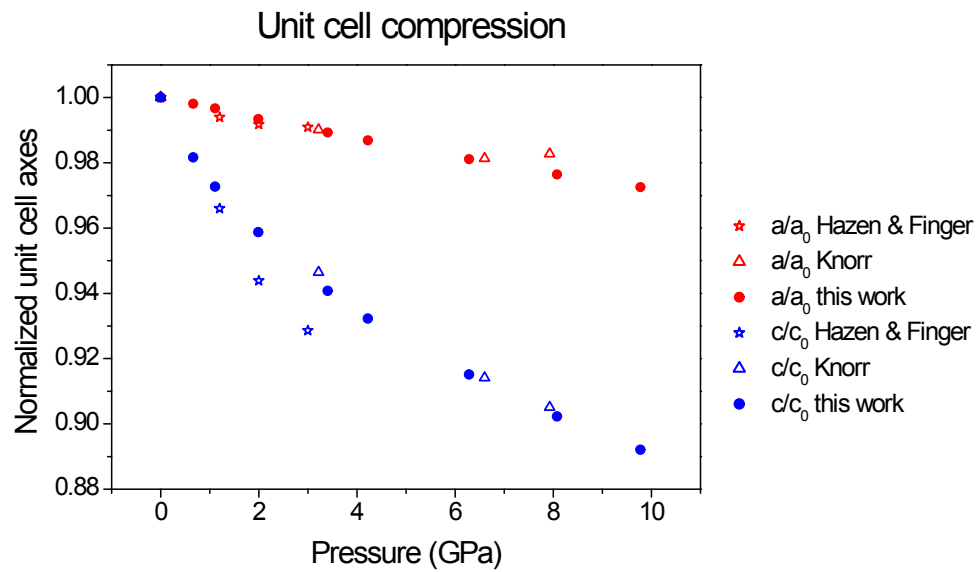

**Fig. S1.** Compression of unit cell axes of  $SnS_2$  from 3 different studies (Hazen & Finger<sup>1</sup>, Knorr *et al.*<sup>2</sup>, and the present study). Data points for  $p > 10$  GPa from the present study have been excluded to enable easy comparison.

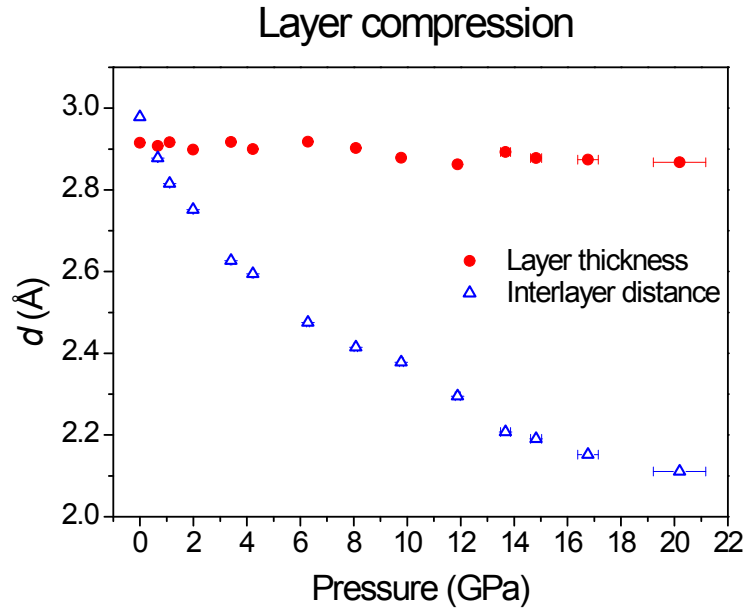

**Fig. S2.** Layer thickness and interlayer distance as a function of pressure. The layer thickness is defined as the distance parallel to  $c$  between two S-atoms on opposite sides of a S-Sn-S sandwich layer:  $d(\text{layer}) = c \cdot 2z(\text{S})$ . In the same manner, the interlayer distance is the distance parallel to  $c$  between two S atoms from two consecutive layers:  $d(\text{interlayer}) = c(1 - 2z(\text{S}))$ .

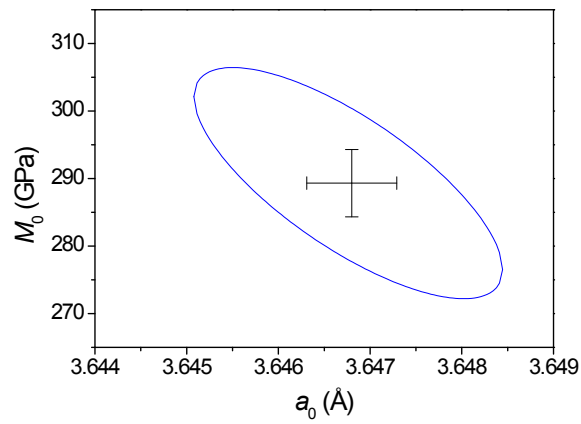

**Fig. S3.** Confidence ellipse for the correlation between  $a_0$  and  $M_0$  (3 sigma level). The crosshair indicates the fitted values and the independently determined uncertainties.

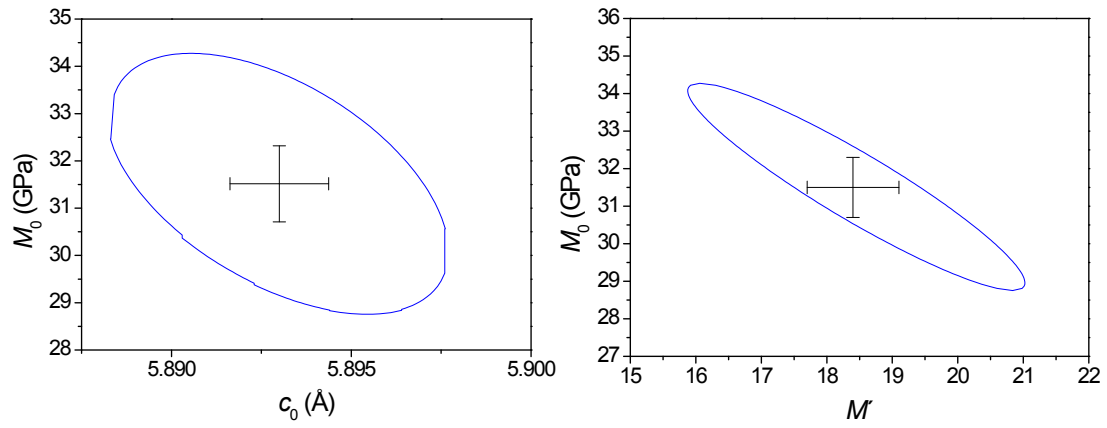

**Fig. S4.** Confidence ellipse for the correlation between  $c_0$  and  $M_0$  (left) and  $M_0$  and  $M'$  (right) (3 sigma level). The crosshairs indicate the fitted values and the independently determined uncertainties.

Calculation of compressibilities:

$$\beta_{0T}(\parallel) = -\frac{1}{a_0} \left( \frac{\partial a}{\partial p} \right)_T = \frac{1}{\left( -a_0 \left( \frac{\partial p}{\partial a} \right)_T \right)} = \frac{1}{M_{0T}(a)} \quad (\text{S1})$$

$$\beta_{0T}(\perp) = -\frac{1}{c_0} \left( \frac{\partial c}{\partial p} \right)_T = \frac{1}{\left( -c_0 \left( \frac{\partial p}{\partial c} \right)_T \right)} = \frac{1}{M_{0T}(c)} \quad (\text{S2})$$

1. R. M. Hazen and L. W. Finger, *Am. Mineral.*, 1978, **63**, 289-292.
2. K. Knorr, L. Ehm, M. Hytha, B. Winkler and W. Depmeier, *Phys. Stat. Sol. B*, 2001, **223**, 435-440.
